# Supplementary material for: Aberrant Functional and Effective Connectivity of the Frontostriatal Network in Unilateral Acute Tinnitus Patients with Hearing Loss
Source: Research Square preprint supplement (doi:10.21203/rs.3.rs-202886/v1), 2021-03-09
Supplement: Supplementary file 1 [file 653b404818d1eb810f8587f7.docx]

**Table S3 Correlation coefficients and significance between abnormal GCA values and different tinnitus characteristics**

| Brain region | Duration | THI | SDS | SAS |
| --- | --- | --- | --- | --- |
| L. Inferior occipital gyrus | -0.239/0.143 | 0.057/0.730 | 0.018/0.914 | 0.029/0.860 |
| B. Midcingulate cortex | -0.105/0.523 | 0.238/0.145 | -0.218/0.182 | -0.197/0.230 |
| L. Midcingulate cortex | -0.274/0.091 | -0.001/0.995 | -0.082/0.621 | -0.039/0.816 |
| L. Midcingulate cortex | **0.372/0.020*** | 0.230/0.159 | 0.125/0.448 | -0.133/0.419 |
| L. Postcentral gyrus | 0.272/0.093 | 0.201/0.219 | 0.054/0.745 | -0.167/0.311 |
| L. Cerebelum_Crus1 | 0.142/0.389 | 0.035/0.834 | **0.319/0.047*** | **0.395/0.013*** |

Partial correlations were conducted with controlling for age, sex, education level and mean hearing thresholds (Data are represented as r/p). *p < 0.05 was considered significant. THI, tinnitus handicap inventory; SAS, self-rating anxiety scale; SDS, self-rating depression scale; L, left; R, right; B. bilateral.
