# Supplementary material for: Aberrant Functional and Effective Connectivity of the Frontostriatal Network in Unilateral Acute Tinnitus Patients with Hearing Loss
Source: Research Square preprint supplement (doi:10.21203/rs.3.rs-202886/v1), 2021-03-09
Supplement: Supplementary file 2 [file c4fdcae5cdcb6e4a9c3a4f31.docx]

**Table S1 Seed regions of interest, center coordinates in MNI space**

| Seed region | L/R | Peak MNI coordinates | | |
| --- | --- | --- | --- | --- |
| x | y | z |
| NAc | L | -10 | 12 | -13 |
| R | 13 | 11 | -13 |
| vmPFC | L | -3 | 44 | -8 |
| R | 3 | 44 | -8 |

Coordinates are described in MNI coordinates. MNI, Montreal Neurological Institute; NAc, nucleus accumbens; vmPFC, ventromedial prefrontal cortices; L, left hemisphere; R, right hemisphere.
